# Supplementary material for: Loss of Human Beta Cell Identity in a Reconstructed Omental Stromal Cell Environment
Source: MDPI journal article supplement (doi:10.3390/cells11060924), 2022-03-08
Supplement: s1 [file s1]

| Patient# | Number | SEX | AGE  | BMI | DIABETIC | Hb1c(g/dl) | Cholesterol(g/dl) | Hypercholesterolemia | Hypertriglyceridemia | HBP | SAS | BloodGlucose(mg/dl) | HDL(g/l) | LDL(g/l) | GGT(U/L) | HbA1C(%) | AST(U/L) | ALT(U/L) |
|----------|--------|-----|------|-----|----------|------------|-------------------|----------------------|----------------------|-----|-----|---------------------|----------|----------|----------|----------|----------|----------|
| 110      | F      | 36  | 58   |     | NO       | 14.6       | 1.51              |                      | NO                   | NO  | YES | 0.95                | 0.38     | 0.95     | 4        | 5.62     | 27       | 30       |
| 2610     | F      | 37  | 44   |     | NO       | 13         | 3.22              |                      | NO                   | NO  | NO  | 0.77                | 0.53     | 2.36     | 27       | X        | 16       | 15       |
| 593      | M      | 26  | 50   |     | NO       | x          | x                 |                      | NO                   | NO  | YES | x                   | x        | x        | x        | x        | x        | x        |
| 595      | F      | 47  | 40   |     | NO       | 13.8       | 2                 |                      | NO                   | NO  | NO  | 1.2                 | 0.59     | 1.15     | X        | 7        | 30       | 41       |
| 2611     | F      | 46  | 46   |     | NO       | 13.3       | 1.8               |                      | NO                   | NO  | NO  | X                   | 0.7      | 0.94     | X        | 5.7      | 21       | 16       |
| 601      | F      | 56  | 32   |     | NO       | 14.8       | 2.46              |                      | NO                   | YES | NO  | 0.99                | 0.7      | 1.65     | 19       | X        | 13       | 13       |
| 604      | M      | 49  | 42.5 |     | YES      | X          | X                 |                      | NO                   | NO  | YES | X                   | X        | X        | X        | X        | X        | X        |
| 605      | F      | 34  | 40   |     | NO       | 13.9       | 2.57              |                      | NO                   | NO  | NO  | 0.91                | 0.68     | 0.76     | 10       | 4.97     | 15       | 12       |
| 606      | M      | 72  | 47   |     | YES      | 12.2       | X                 | YES                  | YES                  | YES | YES | 1.55                | X        | X        | X        | X        | X        | X        |
| 609      | F      | 20  | 59   |     | NO       | 11.5       | 1.87              |                      | NO                   | NO  | NO  | 1.03                | 0.46     | 1.27     | X        | 6.07     | X        | X        |
| 610      | M      | 26  | 54   |     | NO       | 14.6       | 1.81              |                      | NO                   | NO  | NO  | 1.02                | 0.41     | 1.17     | 56       | 5.6      | 43       | 65       |
| 611      | F      | 32  | 47   |     | YES      | 13.7       | 2.06              |                      | NO                   | NO  | NO  | 2                   | 0.39     | 1.21     | 48       | 9.44     | 13       | 23       |
| 613      | F      | 40  | 41   |     | YES      | 10.2       | X                 | NO                   | NO                   | YES | NO  | 1.2                 | X        | X        | X        | 7.7      | X        | X        |
| 614      | F      | 23  | 39   |     | NO       | 14.6       | 1.39              |                      | NO                   | NO  | NO  | X                   | 0.43     | 0.12     | 11       | 5        | 20       | 16       |
| 617      | F      | 37  | 50   |     | NO       | 13.3       | 1.82              |                      | NO                   | NO  | NO  | 0.89                | 0.35     | 1.16     | 19       | 5.6      | 28       | 50       |
| 618      | F      | 36  | 39   |     | NO       | 13.6       | 1.71              |                      | NO                   | NO  | NO  | X                   | 0.56     | 0.93     | 25       | 5        | 13       | 16       |
| 619      | M      | 53  | 35.6 |     | YES      | 14.9       | 1.97              |                      | NO                   | YES | YES | 1.28                | 0.32     | 0.97     | 110      | 6.1      | 20       | 40       |
| 1511     | F      | 54  | 43   |     | NO       | 12.9       | 1.74              |                      | NO                   | NO  | YES |                     | 0.44     | 0.96     | 26       | 5.7      | 21       | 24       |
| 1611     | F      | 55  | 38   |     | NO       | X          | 1.13              |                      | NO                   | NO  | YES | X                   | X        | X        | 21       | X        | 25       | 29       |
| 1811     | F      | 41  | 38.6 |     | NO       | 13         | 2.56              |                      | NO                   | NO  | NO  | 0.9                 | 0.68     | 1.77     | X        | 5.47     | 18       | 19       |
| 1001     | F      | 42  | 37   |     | X        | 15         | X                 |                      | X                    | YES | X   | X                   | X        | X        | X        | X        | X        | X        |
| 1701     | F      | 47  | 39   |     | NO       | X          | X                 |                      | NO                   | NO  | NO  | X                   | X        | X        | X        | X        | X        | X        |
| 1801     | F      | 40  | 35   |     | NO       | X          | X                 |                      | NO                   | NO  | NO  | X                   | X        | X        | X        | X        | X        | X        |
| 2401     | F      | 52  | 35   |     | YES      | 12.3       | X                 |                      | NO                   | NO  | NO  | 0.82                | X        | X        | X        | X        | X        | X        |
| 2501     | M      | 31  | 52   |     | NO       | X          | X                 |                      | NO                   | NO  | YES | X                   | X        | X        | X        | X        | X        | X        |
| 702      | F      | 28  | 40   |     | NO       | 13.9       | 1.26              |                      | NO                   | NO  | NO  | 0.89                | 0.38     | 0.79     | 10       | 5        | 12       | 16       |

Supplementary Table S1. Clinical characteristics of human donors.

| Primer      | Forward                  | Reverse                  |
|-------------|--------------------------|--------------------------|
| CYCLO       | ATGGCAAATGCTGGACCCAACA   | ACATGCTTGCCATCCAACCACT   |
| AP2         | AAGAGAAAACGAGAGGATGA     | CACAGAAATGTTGTAGAGTTCA   |
| IL6         | ATAGGACTGGAGATGTCTGAGG   | GCTTGTGGAGAAGGAGTTTCATAG |
| TGFB1       | ATACAGCAACAATTCCTGGCG    | GATGTCCACTTGCAGTGTGT     |
| MAFA        | ATTCTGGAGAGCGAGAAGTGCCAA | CGCCAGCTTCTCGTATTCTCTCTT |
| NKX6-1      | GAAGAGGACGACGACTACAATAAG | CTGCTGGACTTGTGCTTCT      |
| PDX1        | TACTGGATTGGCGTTGTTGTGGC  | AGGGAGCCTTCCAATGTGTATGGT |
| PRE INSULIN | TCTACCTAGTGTGCGGGGAA     | AGCAATGGGCAGTTGGCTC      |
| IAPP        | TTGGTGCCATTCTCTCATCTAC   | CAAGTAATTCAGTGGCTCTCTCT  |
| HES1        | AGAAAGATAGCTCGCGGCATT    | TACTTCCCCAGCACACTTGG     |
| c-MYC       | GTAGTGGA AAAACCAGCAGCC   | AGAAATACGGCTGCACCCGAG    |
| SOX9        | ACCTATCCAAGCGCATTACCCAC  | ATCATCTCCACGCTTGCTCTGA   |
| PAX4        | AATTCCCTGGACTCAGGACTGCTT | TTCCAAGCCATACAGTAGTGGGCA |
| STAT3       | GCTGCACCTGATCACCTTTG     | AGGTTCCAATTGGGGGCTTG     |
| STAT1       | GGCAAAGAGTGATCAGAAACAA   | GTTCACTGACATTCAGCAACT    |
| SOCS3       | GTCCCCCAGAAGAGCCTATTA    | TTGACGGTCTTCCGACAGAGAT   |
| FGB         | TTCTGTGGTGTCTGGCAAA      | TGCCAAAGTCAACACTACCGT    |
| IL6ST       | TTGTTGGCAAATCAGATGCAG    | CCTTTATGGATTACAGGGCTTCC  |
| SREBF1      | GCACCCACTCCATTGAAGAT     | GGCACTGACTCTTCTCTGATAC   |
| SCD         | ACAACCTACCACCACTCCTTTC   | GGAGACTTTCTTCCGGTCATAG   |
| FASN        | TACGACTACGGCCCTCATTT     | CCATGAAGCTCACCCAGTTATC   |
| PCSK9       | TCCACGCTTCCTGCTGCCAT     | CAGGCAGTCAGGGTCCAGCC     |
| LDLR        | GAGGTCCACATTTGCGACAAC    | GTCATCTCCAGACTGACCATC    |
| HMGCR       | ATTTTGGGTATTGCTGGCCTT    | ATGTGCTTGCTCTGGAAAGGT    |
| SMAD7       | TGTCCAGATGCTGTGCCTTCCT   | CTCGTCTTCTCTCCCACTATG    |
| BMP5        | TCACCAGCGAAGGCATTACA     | AAGCTTGGGCCTTTCTTGTTG    |
| SMAD2       | GCACCCTGCAACAGTGTGTA     | GAGTACTTGTTACCGTCTGCC    |
| SMAD3       | GCTTTGAGGCTGTCTACCACT    | ACACACTGGAACAGCGGATG     |
| NFKBIA      | TGTCCTTGGGTGCTGATGTC     | TCAGCCCCACACTTCAACAG     |
| IRF1        | CCCTGGCTAGAGATGCAGATTA   | GGCATCCTTGTTGATGTCCCA    |
| RELA        | TGAGCCCACAAAAGCCTTATC    | ACAATGCCAGTGCCATACA      |
| NFKBIZ      | CCTAATTCAAATGGGAGCAGCG   | GCAGCTCCAAAAAGAGGCGA     |
| C2CD4A      | ACGCCAGCCTGATACTCCTA     | CCGCCACACCTAGCCTATTA     |
| IL13RA1     | GGGAGCCAGCTCAAATTGTA     | CCCCACTTGCAGACAAATCC     |
| PARP9       | AGCTGGGACAAGAAACCACC     | ACTTTGCCACAGGTCCAACCT    |
| DTX3L       | CAGCACCAGGAACACGAAG      | TACCAGGAAAATGGGCACAGG    |
| JUNB        | TTGTCAAAGCCCTGGACGAT     | GGTTGGTGTAACGGGAGGT      |
| PLOD2       | ATGGACTTTTGCCGTCAGGAT    | TTGGACCACAGCTTTCCATGA    |
| SBNO2       | GGCTGCAGTTTGAGGCTCTGA    | GCAGGGTTATCGTCCAGATG     |

**Supplementary Table S2.** List of primers.

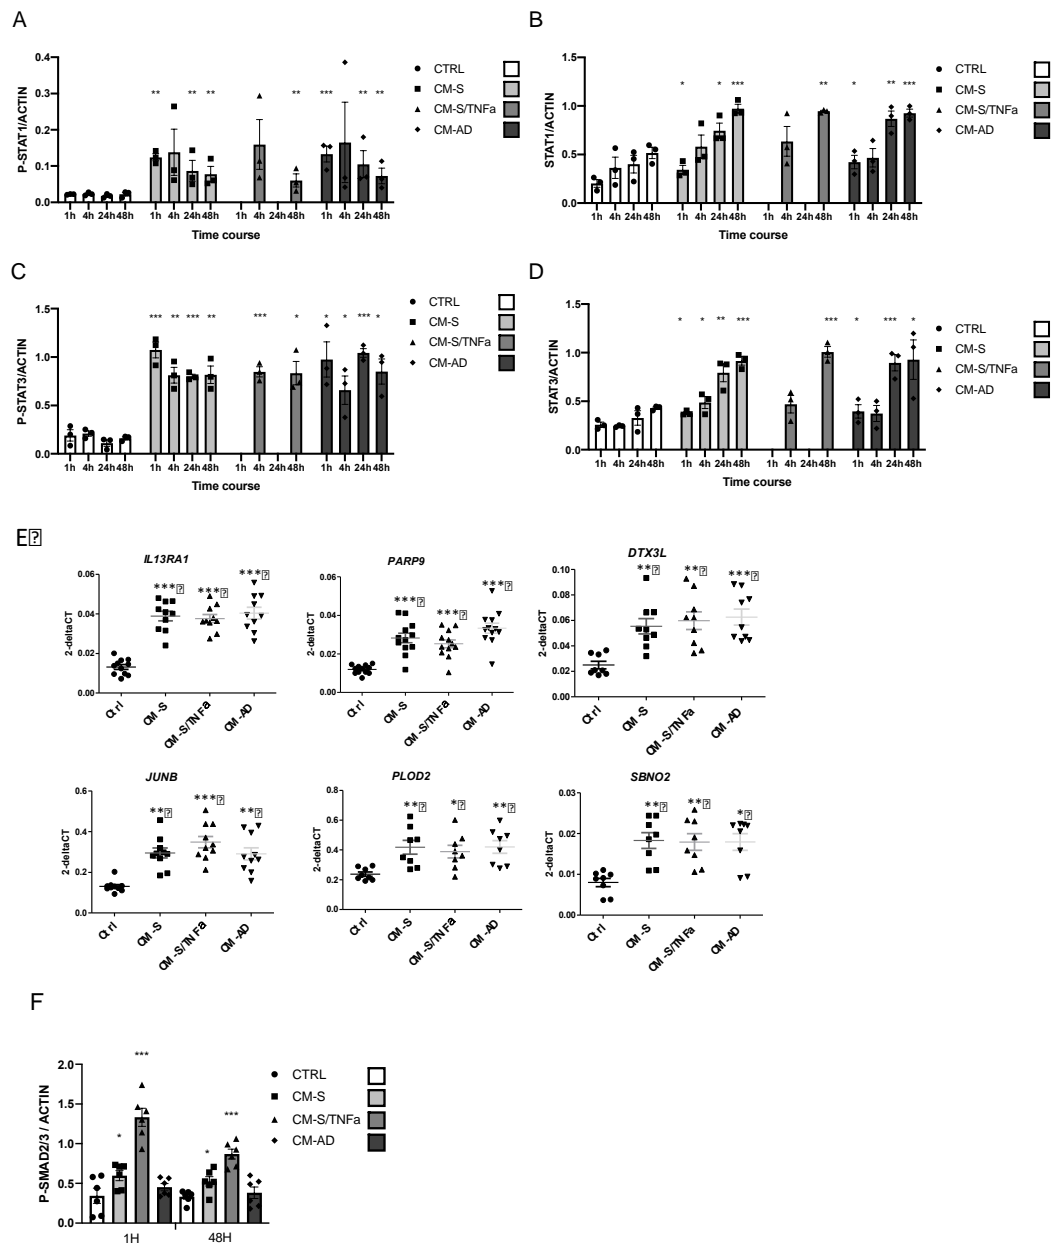

**Figure S1.** CM from omental-derived cells activates STAT and SMAD signaling in EndoC-βH1 cells. (A-D) Quantification of STAT1 and STAT3 phosphorylation and STAT1 and STAT3 proteins relative to ACTIN. (E) Genes linked to the STAT pathway were analyzed by RT-qPCR after 48H treatment. (F) Quantification of SMAD2/3 phosphorylation relative to ACTIN. The error bars represent the mean ± SEM of at least three separate experiments. \*P<0.05; \*\*P<0.01; \*\*\*P<0.005.

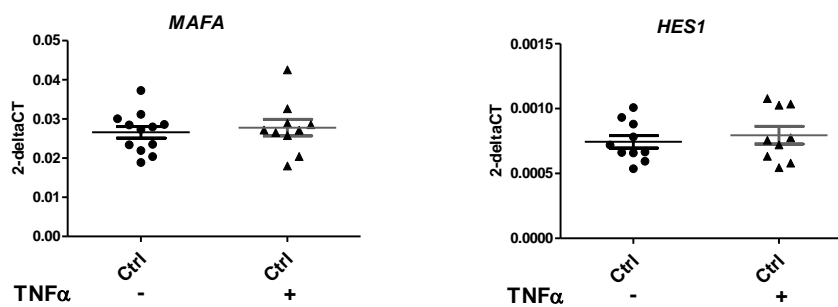

**Figure S2: Recombinant TNF- $\alpha$  does not modulate MAFA and HES1 expression in EndoC- $\beta$ H1 cells.** MAFA and HES1 were analyzed by RT-qPCR after 48H treatment. Data are represented as mean  $\pm$  SD of 5-14 biological replicates. \*\*p < 0.01, \*\*\*p < 0.001.

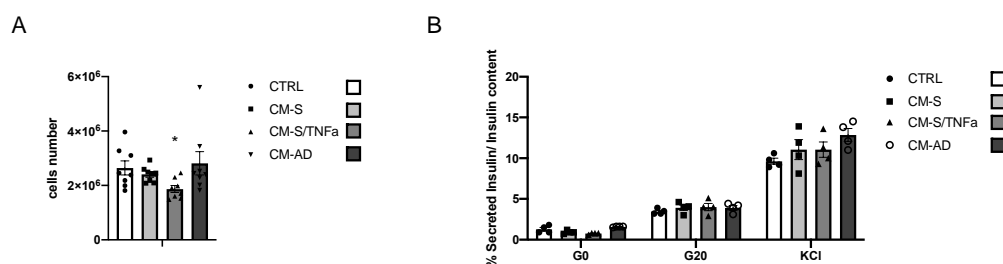

**Figure S3: Conditioned media do not modulate beta cell survival or glucose-stimulated insulin secretion.** EndoC- $\beta$ H1 cells were treated with the different conditioned media during 48 h. (A) Cell number quantification (n=8 per condition). (B) Insulin secretion following a 1-hour incubation with glucose or KCl. Secreted insulin is presented as % of content (n = 4).

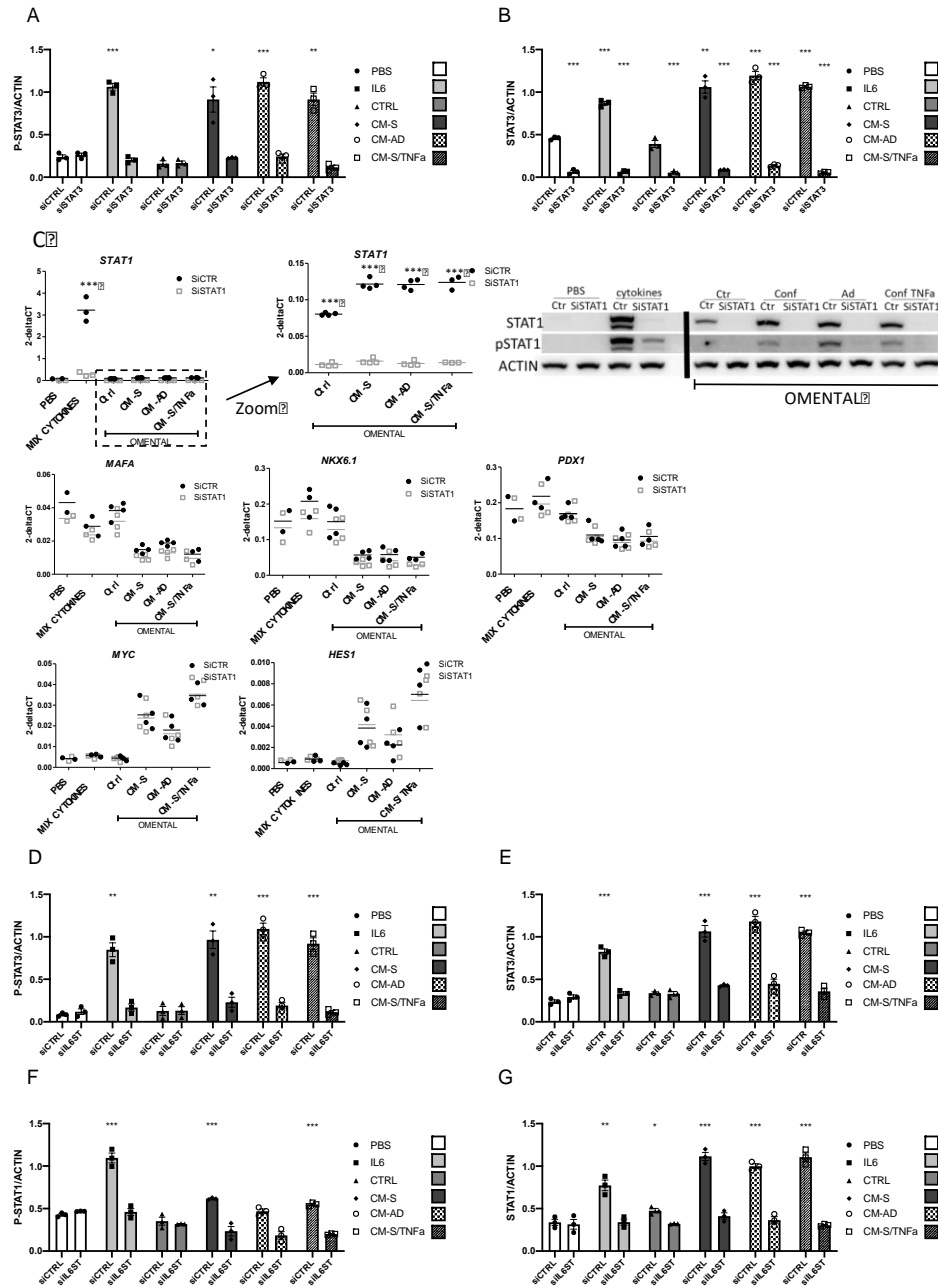

**Figure S4: Efficient STAT1, STAT3 or IL6ST knock-down does not revert the effect of CM on beta cell identity.** (A-B) EndoC- $\beta$ H1 were transfected with siRNA targeting STAT3. Quantification of STAT3 phosphorylation and STAT3 proteins are presented relative to ACTIN. The error bars represent the mean  $\pm$  SEM of three separate experiments. \* $P < 0.05$ ; \*\* $P < 0.01$ ; \*\*\* $P < 0.005$ . (C) Efficient STAT1 knock-down does not revert the effect of CM on beta cell identity. EndoC- $\beta$ H1 cells were transfected with control nontarget siRNA (siCTRL) or siRNA targeting STAT1 (siSTAT1). Two days later, cells were treated with either a mix of cytokines (IFN $\gamma$  and IL1 $\beta$ ) or with CMs for 48H. Analyses were performed by either RT-qPCR or Western blot. RT-qPCR data are represented as mean  $\pm$  SEM of 4-6 biological replicates. \*\*\* $P < 0.001$ . (D-G) EndoC- $\beta$ H1 were transfected siRNA targeting IL6ST. Quantification of STAT1 and STAT3 phosphorylation and STAT1 and STAT3 proteins are presented relative to ACTIN. The error bars represent the mean  $\pm$  SEM of three separate experiments. \* $P < 0.05$ ; \*\* $P < 0.01$ ; \*\*\* $P < 0.005$ .

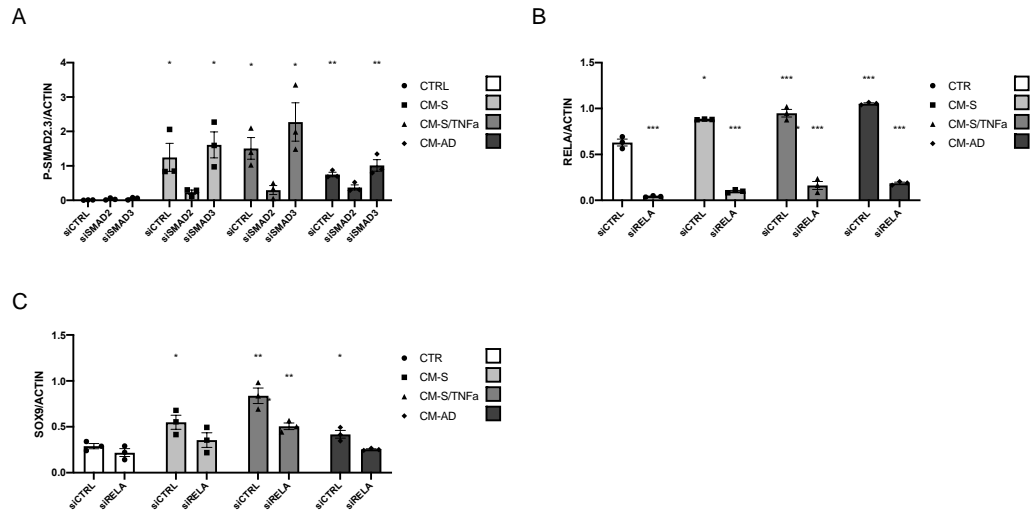

**Figure S5: Efficient SMAD2/3 or RELA knock-down does not revert the effect of CM on beta cell identity.** EndoC-βH1 were transfected with siRNA targeting SMAD2, SMAD3 or RELA. Quantification of (A) P-SMAD2/3, (B) RELA and (C) SOX9 are presented relative to ACTIN. The error bars represent the mean ± SEM of three separate experiments. \*P<0.05; \*\*P<0.01; \*\*\*P<0.005.
